# Supplementary material for: Comparison of Contact Patterns Relevant for Transmission of Respiratory Pathogens in Thailand and the Netherlands Using Respondent-Driven Sampling
Source: PubMed Central journal article supplement (PMC4244136; doi:10.1371/journal.pone.0113711), 2014-11-25

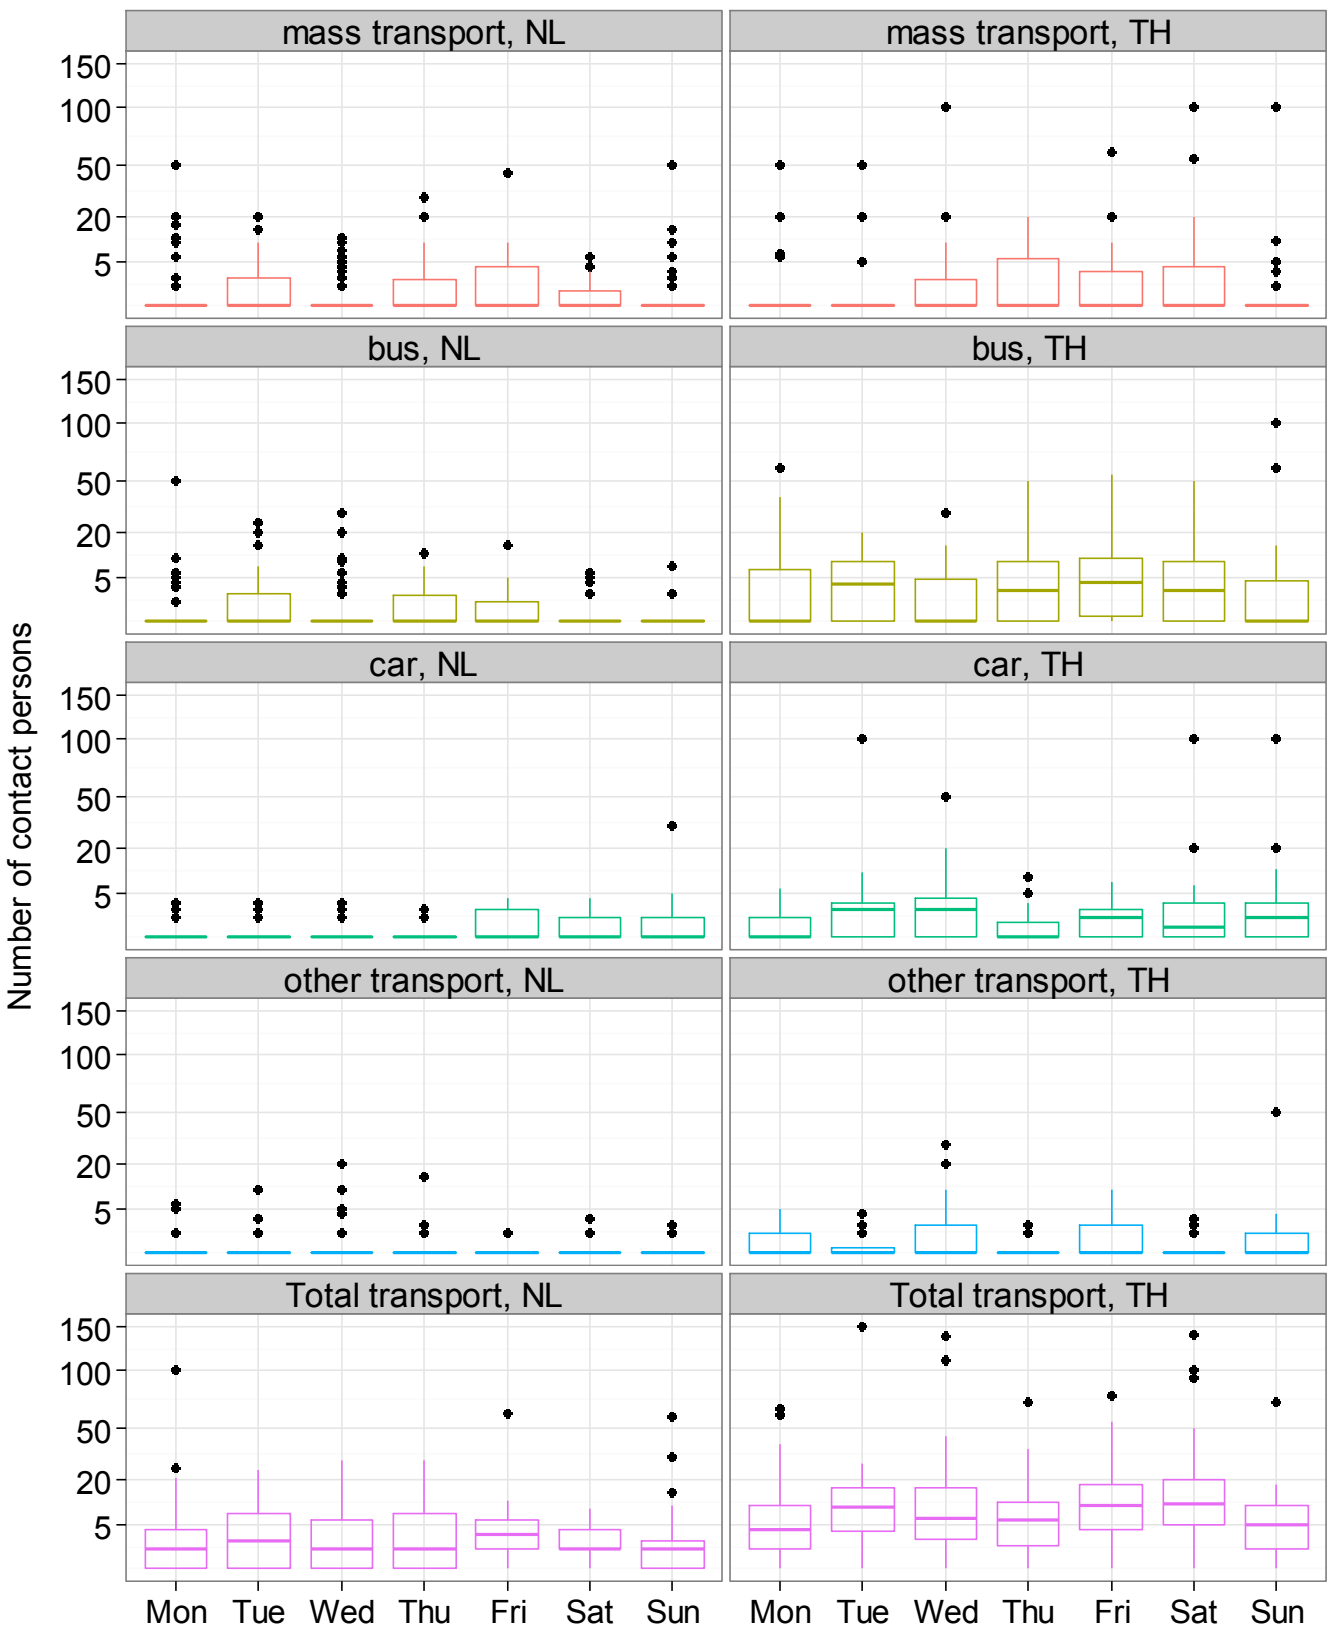

Supplement: pone.0113711.s004.pdf [file pone.0113711.s004.pdf]
