# Supplementary material for: Comparison of Contact Patterns Relevant for Transmission of Respiratory Pathogens in Thailand and the Netherlands Using Respondent-Driven Sampling
Source: PubMed Central journal article supplement (PMC4244136; doi:10.1371/journal.pone.0113711), 2014-11-25

**A**Netherlands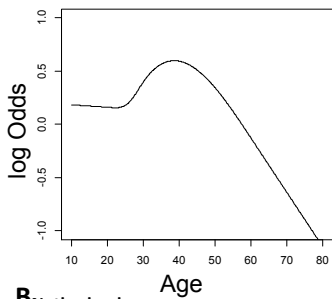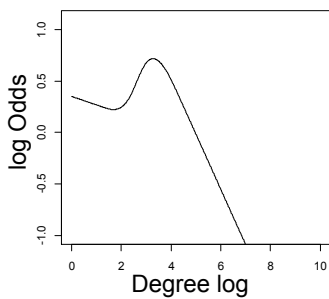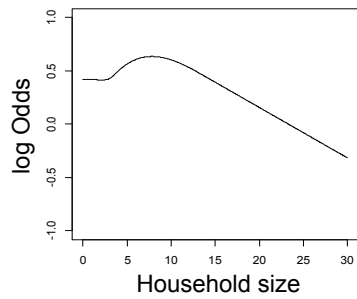**B**Netherlands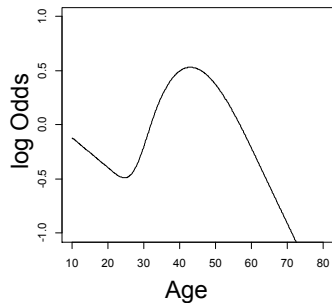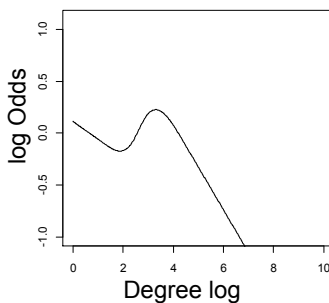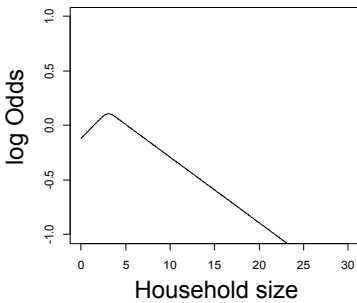**C**Thailand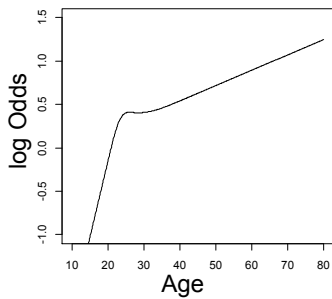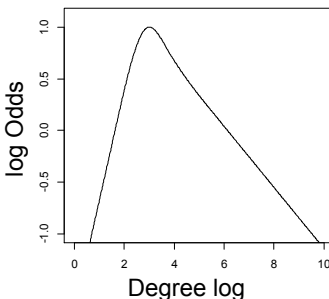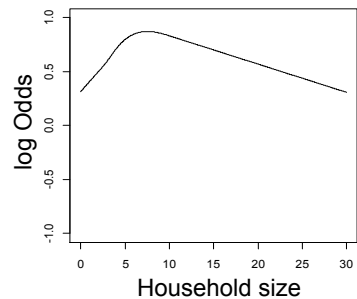**D**Thailand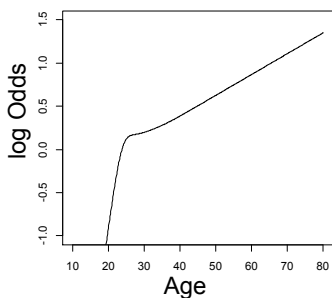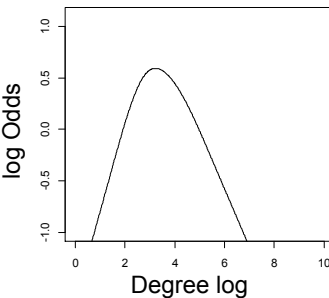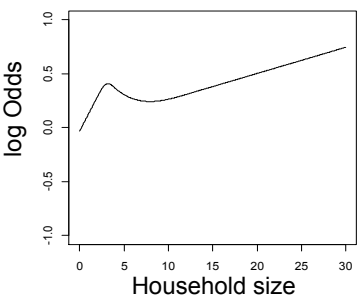

Supplement: pone.0113711.s005.pdf [file pone.0113711.s005.pdf]
