# Supplementary material for: Comparison of Contact Patterns Relevant for Transmission of Respiratory Pathogens in Thailand and the Netherlands Using Respondent-Driven Sampling
Source: PubMed Central journal article supplement (PMC4244136; doi:10.1371/journal.pone.0113711), 2014-11-25
Supplement: pone.0113711.s006.pdf [file pone.0113711.s006.pdf]

**Table S1. Subset of transport and location type of interest as shown in questionnaire**

|                           | <b>Displayed for participants in the Netherlands</b> | <b>Displayed for participants in Thailand</b> |
|---------------------------|------------------------------------------------------|-----------------------------------------------|
| <b>Locations</b>          | at home                                              | at home                                       |
|                           | at work                                              | at work                                       |
|                           | at school / university                               | at school / university                        |
|                           | in a restaurant                                      | in a restaurant                               |
|                           | in a coffee shop                                     | in a coffee shop                              |
|                           | at sports / leisure                                  | at sports / leisure                           |
|                           | at a concert / theater / cinema                      | at a concert / theater / cinema               |
|                           | at other places                                      | at other places                               |
| <b>Transport vehicles</b> | Train and/or airplane                                | Skytrain and/or subway and/or airplane        |
|                           | Bus and/or metro and/or tram                         | Bus and/or minibus and/or shuttle boot        |
|                           | Car                                                  | Car and/or taxi                               |
|                           | Other transport vehicle                              | Motorbike and/or Tuk-Tuk                      |
