# Supplementary material for: Comparison of Contact Patterns Relevant for Transmission of Respiratory Pathogens in Thailand and the Netherlands Using Respondent-Driven Sampling
Source: PubMed Central journal article supplement (PMC4244136; doi:10.1371/journal.pone.0113711), 2014-11-25
Supplement: pone.0113711.s007.pdf [file pone.0113711.s007.pdf]

**Table S2. Symptoms displayed in questionnaire**

|                                                                |
|----------------------------------------------------------------|
| Have you had any of the following complaints in the past week? |
| No complaints                                                  |
| Fever                                                          |
| Chills                                                         |
| Runny or blocked nose                                          |
| Sore throat                                                    |
| Cough                                                          |
| Headache                                                       |
| Muscle/joint pain                                              |
| Diarrhea                                                       |
| Other, namely                                                  |
