# Supplementary material for: Comparison of Contact Patterns Relevant for Transmission of Respiratory Pathogens in Thailand and the Netherlands Using Respondent-Driven Sampling
Source: PubMed Central journal article supplement (PMC4244136; doi:10.1371/journal.pone.0113711), 2014-11-25
Supplement: pone.0113711.s008.pdf [file pone.0113711.s008.pdf]

**Table S3. Exploring the first-order Markov assumption: correlations in country samples**

|                    | <b>Geodesic distance<sup>a</sup></b> | <b>0 – 1</b>                     | <b>1 – 2</b>                     | <b>2 – 3</b>                       | <b>0 – 3</b>         |
|--------------------|--------------------------------------|----------------------------------|----------------------------------|------------------------------------|----------------------|
| <b>Netherlands</b> | <b>age</b> ( $r$ )                   | 0.295 [0.131–0.443]*             | 0.614 [0.455–0.734]*             | 0.473 [0.160–0.699] <sup>£</sup>   | 0.171 [-0.177–0.481] |
|                    | <b>gender</b> ( $r_\phi$ )           | 0.227 [0.059–0.383] <sup>£</sup> | 0.382 [0.177–0.555]*             | 0.336 [-0.002–0.606]               | 0.106 [-0.241–0.428] |
| <b>Thailand</b>    | <b>age</b> ( $r$ )                   | 0.524 [0.350–0.663]*             | 0.621 [0.394–0.777]*             | 0.451 [0.011 – 0.745] <sup>£</sup> | 0.320 [-0.143–0.668] |
|                    | <b>gender</b> ( $r_\phi$ )           | 0.192 [-0.022–0.389]             | 0.347 [0.052–0.586] <sup>£</sup> | 0.192 [-0.273 – 0.585]             | 0.000 [-0.443–0.443] |

<sup>a</sup>. Link distance between seeds in wave 0 and contact persons in consecutive waves (waves 1 to 3).

\* p-value < 0.001

<sup>£</sup> p-value < 0.05
